# Supplementary material for: Suspected cases of intracontinental Burkholderia pseudomallei sequence type homoplasy resolved using whole-genome sequencing
Source: PubMed Central journal article supplement (PMC5729916; doi:10.1099/mgen.0.000139), 2017-11-14
Supplement: mgen-3-139-s001.pdf [file mgen-3-139-s001.pdf]

## SUPPLEMENTAL DATA

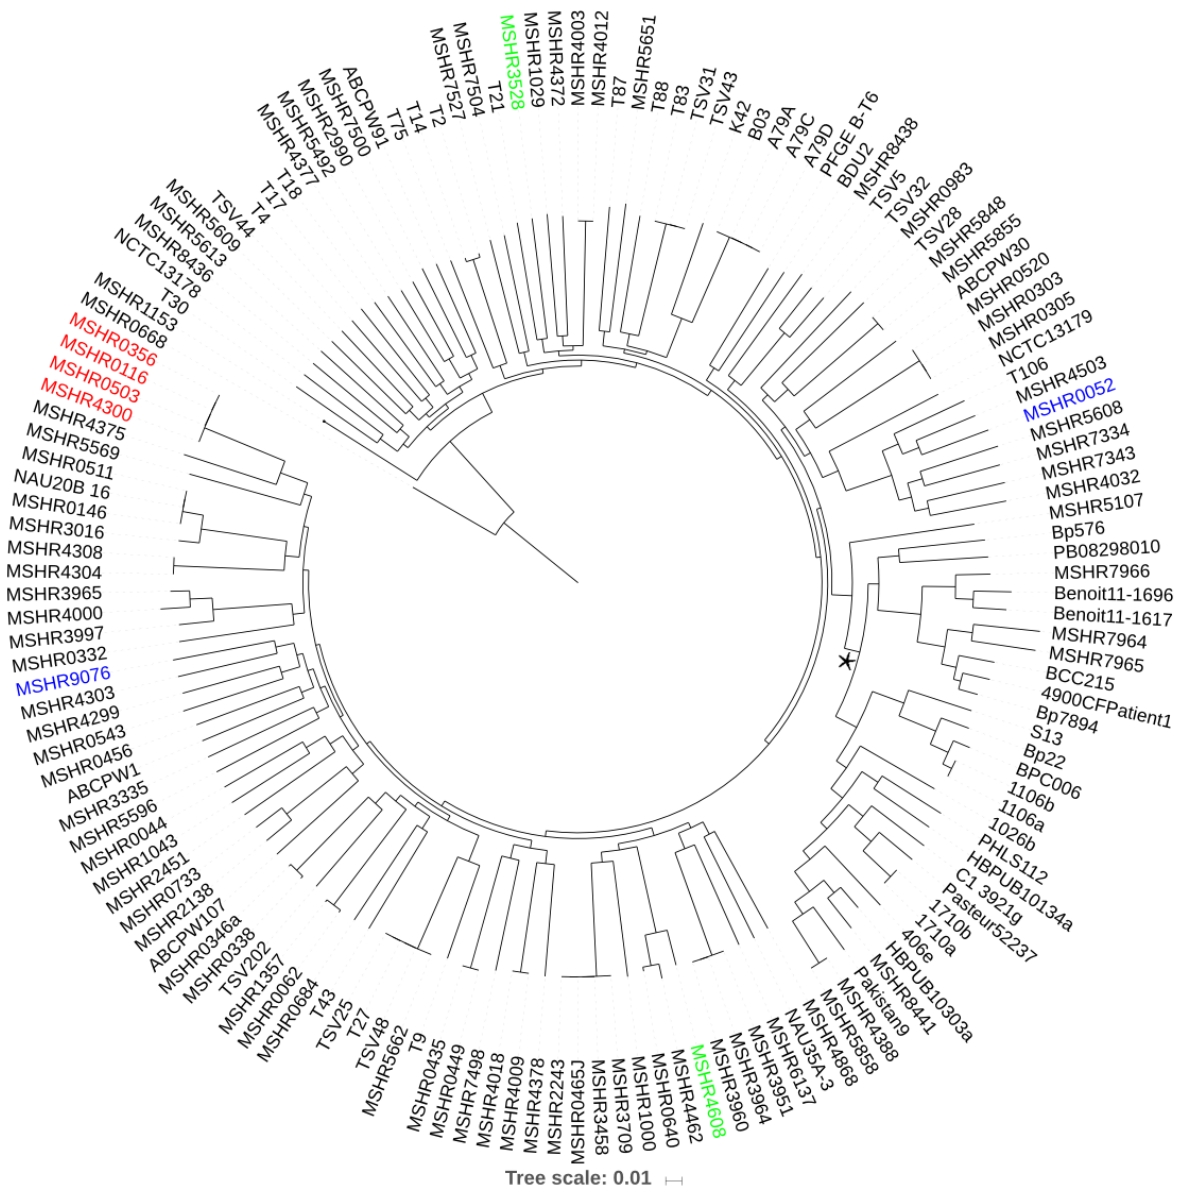

**Figure S1.** Maximum likelihood phylogenetic analysis of 150 *Burkholderia pseudomallei* genomes constructed using 207,694 orthologous, biallelic SNPs. MSHR1153 was used as a reference, and the tree was rooted using MSHR0668. Suspected cases of ST homoplasies are coloured as follows: red, ST-149 (MSHR0116, MSHR0356, MSHR0503, and MSHR4300); blue, ST-722 (MSHR0052 and MSHR9076); green, ST-804 (MSHR3528 and MSHR4608). The asterisk denotes the branch point for the non-Australian clade. The topology of this tree was highly similar to that of the maximum parsimony tree (Fig. 1).

Tree scale: 1

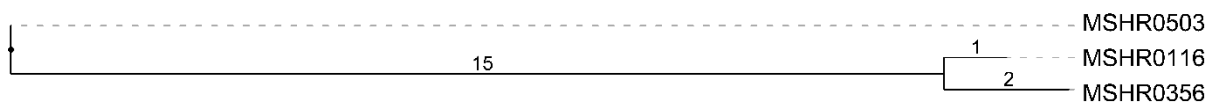

**Figure S2.** Maximum parsimony phylogenetic analysis of remote Australian island *Burkholderia pseudomallei* isolates belonging to ST-149, using the environmental isolate MSHR0503 as a reference genome. Eighteen SNPs were identified, with 15 SNPs separating the common ancestor of the clinical isolates (MSHR0356 and MSHR0116) from the environmental isolate (MSHR0503).

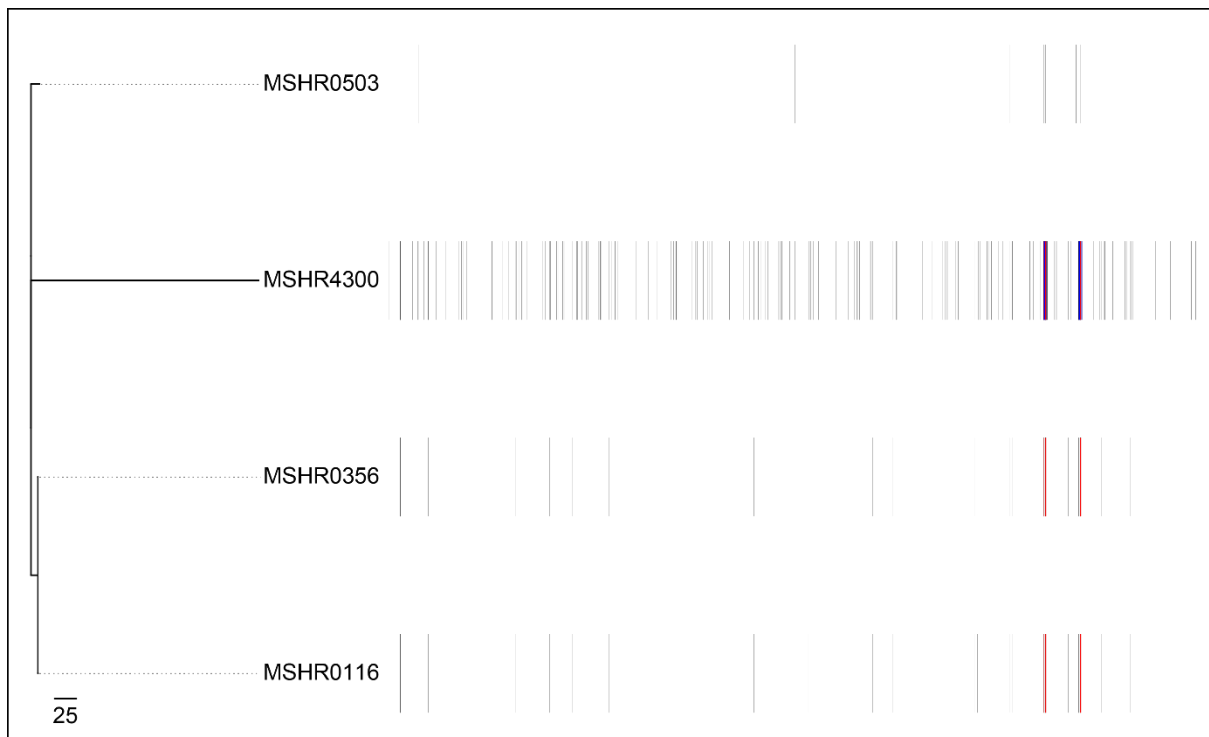

**Figure S3.** Phylogenetic reconstruction of ST-149 genomes, with predicted regions of recombination according to Gubbins [26]. Black bars: all SNPs; red and blue bars: synapomorphic and autapomorphic SNPs, respectively, identified in recombinogenic regions. SNPs found in recombinogenic regions were removed prior to molecular clock analysis.
